# Supplementary material for: N6-methyladenosine modulation classes and immune microenvironment regulation in ischemic stroke
Source: Front Mol Neurosci. 2022 Dec 23;15:1013076. doi: 10.3389/fnmol.2022.1013076 (PMC9907088; doi:10.3389/fnmol.2022.1013076)
Supplement: Supplementary file 17 [file Data_Sheet_10.XLSX]

## Sheet: sheet1
#Drugs	Indication	Target	Num_targets	Distance	Proximity
Amrinone	Used in the treatment of congestive heart failure.	PDE3A,PDE4B,TNF	3	-0.0148408	-0.0511846
Curcumin	No approved therapeutic indications.	PPARG,VDR,ABCC5,CBR1,GSTP1	5	-0.0221748	-0.0512066
Curcumin sulfate	No approved therapeutic indications.	PPARG,VDR,ABCC5,CBR1,GSTP1	5	-0.0221748	-0.0512066
Vandetanib	Vandetanib is currently approved as an alternative to local therapies for both unresectable and disseminated disease. Because Vandetanib can prolong the Q-T interval, it is contraindicated for use in patients with serious cardiac complications such as congenital long QT syndrome and uncompensated heart failure.	VEGFA,EGFR,PTK6,TEK,RET	5	-0.0286269	-0.0512259
Ribavirin	Indicated for the treatment of chronic Hepatitis C virus (HCV) infection in combination with other antiviral agents with the intent to cure or achieve a sustained virologic response (SVR). Typically added to improve SVR and reduce relapse rates [A19644].	IMPDH1,IMPDH2,NT5C2,ENPP1	4	-0.06567	-0.0513372
Purvalanol	-	CDK4,MAPK1,MAPK3,CDK2,SRPK2	5	-0.0738896	-0.0513618
Dotarizine	Investigated for use/treatment in migraine and cluster headaches.	HTR2A,HTR1A,CACNA1A,HTR2C	4	-0.108497	-0.0514657
Cyanocobalamin	For treatment of pernicious anemia (due to lack of or inhibition of intrinsic factor) and for prevention and treatment of vitamin B 12 deficiency [L2064], [L2068].	MTR,MMUT,MTRR,MMAA,MMACHC,MTHFR	6	-0.108748	-0.0514665
Captodiame	Captodiame is indicated for the treatment of anxiety.	HTR2C,SIGMAR1,DRD3	3	-0.144662	-0.0515743
Aluminium monostearate	-	TNNC1,VDAC1,VDAC2,VDAC3	4	-0.212537	-0.0517781
Methyltrienolone	-	PGR,AR,NCOA2,NR3C2	4	-0.251833	-0.051896
Talmapimod	Investigated for use/treatment in pain (acute or chronic) and rheumatoid arthritis.	MAPK14,TNF,IL1B,MT-CO2	4	-0.282475	-0.051988
Androstenedione	-	HSD17B1,HSD3B1,AKR1C3	3	-0.314813	-0.0520851
Nicotinamide Mononucleotide	-	NMNAT1,NMNAT3,BST1	3	-0.359179	-0.0522183
Calcitriol	Used to treat vitamin D deficiency or insufficiency, refractory rickets (vitamin D resistant rickets), familial hypophosphatemia and hypoparathyroidism, and in the management of hypocalcemia and renal osteodystrophy in patients with chronic renal failure undergoing dialysis. Also used in conjunction with calcium in the management and prevention of primary or corticosteroid-induced osteoporosis.	VDR,HOXA10,GC	3	-0.370291	-0.0522517
Tazarotene	Used to treat psoriasis, acne and sun damaged skin (photodamage).	RARA,RXRB,RARG,RARB	4	-0.377715	-0.052274
LGD-1550	Investigated for use/treatment in cancer/tumors (unspecified).	RARA,RARB,RARG,JUN	4	-0.377715	-0.052274
Mercaptopurine	For remission induction and maintenance therapy of acute lymphatic leukemia.	HPRT1,PPAT,IMPDH1	3	-0.420893	-0.0524036
Taribavirin	Investigated for use/treatment in hepatitis (viral, C).	NT5C2,IMPDH1,ENPP1	3	-0.420893	-0.0524036
Dapoxetine	For the treatment of premature ejaculation.	HTR1A,HTR1B,HTR2C	3	-0.477996	-0.052575
Agomelatine	Agomelatine is indicated for the treatment of major depressive episodes in adults.	HTR2C,MTNR1A,MTNR1B	3	-0.477996	-0.052575
KC706	Investigated for use/treatment in cardiovascular disorders, inflammatory bowel disease, inflammatory disorders (unspecified), psoriasis and psoriatic disorders, and rheumatoid arthritis.	MAPK14,MAPK11,MAPK12,MAPK13	4	-0.532475	-0.0527386
VX-702	Investigated for use/treatment in coronary artery disease, inflammatory disorders (unspecified), and rheumatoid arthritis.	MAPK14,TNF,IL1B,IL6	4	-0.532475	-0.0527386
Phylloquinone	For the treatment of haemorrhagic conditions in infants, antidote for coumarin anticoagulants in hypoprothrombinaemia.	GGCX,BGLAP	2	-0.598612	-0.0529371
2-chloro-5-nitro-N-phenylbenzamide	-	NCOA2,PPARG,RXRA	3	-0.669111	-0.0531488
2-[(2,4-DICHLOROBENZOYL)AMINO]-5-(PYRIMIDIN-2-YLOXY)BENZOIC ACID	-	PPARG,NCOA2,RXRA	3	-0.669111	-0.0531488
(2E,4E)-11-METHOXY-3,7,11-TRIMETHYLDODECA-2,4-DIENOIC ACID	-	NCOA2,RXRB,NR1H3	3	-0.669111	-0.0531488
Alfacalcidol	Alfacalcidol is an active metabolite of Vitamin D, which performs important functions in regulation of the calcium balance and the bone metabolism.	VDR,CYP27B1,RXRA	3	-0.703625	-0.0532524
Dexfenfluramine	For the management of obesity including weight loss and maintenance of weight loss in patients on a reduced calorie diet	SLC6A4,HTR2C	2	-0.716994	-0.0532926
Isosorbide	-	BCL2,BCL2L1,MCL1	3	-0.754227	-0.0534043
2-[METHYL-(5-GERANYL-4-METHYL-PENT-3-ENYL)-AMINO]-ETHYL-DIPHOSPHATE	-	FNTA,PGGT1B	2	-0.916607	-0.0538918
Equilin	For the treatment of moderate to severe vasomotor symptoms associated with the menopause, atrophic vaginitis, osteoporosis, hypoestrogenism due to hypogonadism, castration, primary ovarian failure, breast cancer (for palliation only), and Advanced androgen-dependent carcinoma of the prostate (for palliation only)	HSD17B1,ESR1	2	-0.972219	-0.0540588
Deamido-Nad+	-	NMNAT1,NMNAT3	2	-1.03877	-0.0542586
4-Bromo-2,5-dimethoxyphenethylamine	-	HTR2C,HTR2A	2	-1.21699	-0.0547937
Deramciclane	Investigated for use/treatment in anxiety disorders.	HTR2A,HTR2C	2	-1.21699	-0.0547937
Sarpogrelate	-	HTR2C,HTR2A	2	-1.21699	-0.0547937
Eplivanserin	-	HTR2A,HTR2C	2	-1.21699	-0.0547937
2,5-Dimethoxy-4-ethylthioamphetamine	-	HTR2A,HTR2C	2	-1.21699	-0.0547937
Pagoclone	For the potential treatment of panic and anxiety disorders.	GABRA2,GABRA3	2	-1.33178	-0.0551383
AZD-7325	-	GABRA3,GABRA2	2	-1.33178	-0.0551383
Candoxatril	-	MME,ACE	2	-1.3806	-0.0552848
Omapatrilat	For the treatment of hypertension.	ACE,MME	2	-1.3806	-0.0552848
N-[3-[(1-Aminoethyl)(Hydroxy)Phosphoryl]-2-(1,1'-Biphenyl-4-Ylmethyl)Propanoyl]Alanine	-	MME,LTA4H	2	-1.3806	-0.0552848
Phosphoramidon	-	MME,KEL	2	-1.3806	-0.0552848
PRLX 93936	Investigated for use/treatment in solid tumors.	VDAC2,VDAC3	2	-1.42507	-0.0554184
17-METHYL-17-ALPHA-DIHYDROEQUILENIN	-	ESR1,NCOA2	2	-1.50367	-0.0556543
4-(2-amino-1-methyl-1H-imidazo[4,5-b]pyridin-6-yl)phenol	-	ESR1,NCOA2	2	-1.50367	-0.0556543
4-[(1S,2S,5S)-5-(HYDROXYMETHYL)-8-METHYL-3-OXABICYCLO[3.3.1]NON-7-EN-2-YL]PHENOL	-	NCOA2,ESR1	2	-1.50367	-0.0556543
4-[(1S,2S,5S,9R)-5-(HYDROXYMETHYL)-8,9-DIMETHYL-3-OXABICYCLO[3.3.1]NON-7-EN-2-YL]PHENOL	-	ESR1,NCOA2	2	-1.50367	-0.0556543
4-[(1S,2S,5S)-5-(HYDROXYMETHYL)-6,8,9-TRIMETHYL-3-OXABICYCLO[3.3.1]NON-7-EN-2-YL]PHENOL	-	ESR1,NCOA2	2	-1.50367	-0.0556543
(9ALPHA,13BETA,17BETA)-2-[(1Z)-BUT-1-EN-1-YL]ESTRA-1,3,5(10)-TRIENE-3,17-DIOL	-	ESR1,NCOA2	2	-1.50367	-0.0556543
(9BETA,11ALPHA,13ALPHA,14BETA,17ALPHA)-11-(METHOXYMETHYL)ESTRA-1(10),2,4-TRIENE-3,17-DIOL	-	ESR1,NCOA2	2	-1.50367	-0.0556543
3-CHLORO-2-(4-HYDROXYPHENYL)-2H-INDAZOL-5-OL	-	ESR1,NCOA2	2	-1.50367	-0.0556543
3-ETHYL-2-(4-HYDROXYPHENYL)-2H-INDAZOL-5-OL	-	ESR1,NCOA2	2	-1.50367	-0.0556543
dimethyl (1R,4S)-5,6-bis(4-hydroxyphenyl)-7-oxabicyclo[2.2.1]hepta-2,5-diene-2,3-dicarboxylate	-	ESR1,NCOA2	2	-1.50367	-0.0556543
4-[1-allyl-7-(trifluoromethyl)-1H-indazol-3-yl]benzene-1,3-diol	-	ESR1,NCOA2	2	-1.50367	-0.0556543
4-(6-HYDROXY-1H-INDAZOL-3-YL)BENZENE-1,3-DIOL	-	ESR1,NCOA2	2	-1.50367	-0.0556543
DIETHYL (1R,2S,3R,4S)-5,6-BIS(4-HYDROXYPHENYL)-7-OXABICYCLO[2.2.1]HEPT-5-ENE-2,3-DICARBOXYLATE	-	ESR1,NCOA2	2	-1.50367	-0.0556543
2-Amino-1-methyl-6-phenylimidazo(4,5-b)pyridine	-	ESR1,NCOA2	2	-1.50367	-0.0556543
4-[(1S,2R,5S)-4,4,8-TRIMETHYL-3-OXABICYCLO[3.3.1]NON-7-EN-2-YL]PHENOL	-	ESR1,NCOA2	2	-1.50367	-0.0556543
tributylstannanyl	-	NCOA2,RXRA	2	-1.50367	-0.0556543
RALOXIFENE CORE	-	ESR1,NCOA2	2	-1.50367	-0.0556543
Becocalcidiol	For topical treatment of psoriasis and psoriatic disorders.	MED1,VDR	2	-1.55544	-0.0558097
CTA018	Investigated for use/treatment in kidney disease and psoriasis and psoriatic disorders.	CYP24A1,VDR	2	-1.55544	-0.0558097
(1R,3R)-5-[(2E)-3-{(1S,3R)-2,2,3-trimethyl-3-[6,6,6-trifluoro-5-hydroxy-5-(trifluoromethyl)hex-3-yn-1-yl]cyclopentyl}prop-2-en-1-ylidene]cyclohexane-1,3-diol	-	NCOA1,VDR	2	-1.55544	-0.0558097
1,3-CYCLOHEXANEDIOL, 4-METHYLENE-5-[(2E)-[(1S,3AS,7AS)-OCTAHYDRO-1-(5-HYDROXY-5-METHYL-1,3-HEXADIYNYL)-7A-METHYL-4H-INDEN-4-YLIDENE]ETHYLIDENE]-, (1R,3S,5Z)	-	NCOA1,VDR	2	-1.55544	-0.0558097
Vitamin D	Vitamin D is indicated for use in the treatment of hypoparathyroidism, refractory rickets (also known as vitamin D resistant rickets), and familial hypophosphatemia [FDA Label].	VDR,GC	2	-1.55544	-0.0558097
Mycophenolate mofetil	For the prophylaxis of organ rejection in patients receiving allogeneic renal, cardiac or hepatic transplants. Mycophenolate mofetil should be used concomitantly with cyclosporine and corticosteroids.	IMPDH1,IMPDH2	2	-1.63134	-0.0560376
Mycophenolic acid	For the prophylaxis of organ rejection in patients receiving allogeneic renal transplants, administered in combination with cyclosporine and corticosteroids.	IMPDH1,IMPDH2	2	-1.63134	-0.0560376
6-Chloropurine Riboside, 5'-Monophosphate	-	IMPDH1,IMPDH2	2	-1.63134	-0.0560376
VX-148	Investigated for use/treatment in autoimmune diseases, psoriasis and psoriatic disorders, and viral infection.	IMPDH1,IMPDH2	2	-1.63134	-0.0560376
Thymidine-5'-Triphosphate	-	TK2,TK1	2	-1.72133	-0.0563078
Tamibarotene	Investigated for use/treatment in leukemia (unspecified).	RARA,RARB	2	-1.75543	-0.0564101
Azathioprine	For use in rheumatoid arthritis, preventing renal transplant rejection, Crohn's disease, and colitis.	HPRT1,RAC1	2	-1.80756	-0.0565667
Emodin	-	CSNK2A1,AHR	2	-1.8979	-0.0568379
AT9283	Investigated for use/treatment in cancer/tumors (unspecified), leukemia (myeloid), and solid tumors.	AURKA,AURKB	2	-2.03445	-0.0572478
CYC116	Advanced solid tumors	AURKA,KDR	2	-2.03445	-0.0572478
SNS-314	Investigated for use/treatment in solid tumors.	AURKA,AURKC	2	-2.03445	-0.0572478
4-(4-METHYLPIPERAZIN-1-YL)-N-[5-(2-THIENYLACETYL)-1,5-DIHYDROPYRROLO[3,4-C]PYRAZOL-3-YL]BENZAMIDE	-	AURKA,PLK1	2	-2.03445	-0.0572478
N-[3-(1H-BENZIMIDAZOL-2-YL)-1H-PYRAZOL-4-YL]BENZAMIDE	-	AURKA,CDK2	2	-2.03445	-0.0572478
3-(Benzyloxy)Pyridin-2-Amine	-	MAPK14,LTA4H	2	-2.06495	-0.0573394
SB220025	-	MAPK14,MAPK1	2	-2.06495	-0.0573394
1-[1-(3-aminophenyl)-3-tert-butyl-1H-pyrazol-5-yl]-3-naphthalen-1-ylurea	-	SRC,MAPK14	2	-2.06495	-0.0573394
4-[5-(4-FLUORO-PHENYL)-2-(4-METHANESULFINYL-PHENYL)-3H-IMIDAZOL-4-YL]-PYRIDINE	-	MAPK14,MAPK1	2	-2.06495	-0.0573394
Anisindione	For the prophylaxis and treatment of venous thrombosis and its extension, the treatment of atrial fibrillation with embolization, the prophylaxis and treatment of pulmonary embolism, and as an adjunct in the treatment of coronary occlusion.	GGCX	1	-2.19722	-0.0577365
Reserpine	Foe the treatment of hypertension	SLC18A2,SLC18A1,BIRC5	3	-2.32127	-0.0581089
Androstanedione	-	HSD17B1	1	-2.94444	-0.0599798
EM-1745	-	HSD17B1	1	-2.94444	-0.0599798
beta-D-Ribose-5-phosphate	-	NUDT9	1	-2.94444	-0.0599798
Milrinone	Indicated for the treatment of congestive heart failure.	PDE3A	1	-3.04452	-0.0602803
Anagrelide	For the treatment of patients with thrombocythemia, secondary to myeloproliferative disorders, to reduce the elevated platelet count and the risk of thrombosis and to ameliorate associated symptoms including thrombo-hemorrhagic events.	PDE3A	1	-3.04452	-0.0602803
Cilostazol	For the reduction of symptoms of intermittent claudication (pain in the legs that occurs with walking and disappears with rest).	PDE3A	1	-3.04452	-0.0602803
Enoximone	For the treatment of congestive heart failure.	PDE3A	1	-3.04452	-0.0602803
Potassium perchlorate	No current FDA- or EMA-approved therapeutic indications.	SLC5A5	1	-3.04452	-0.0602803
Brentuximab vedotin	Seattle Genetics Announced FDA Approval of ADCETRIS<U+00AE> (Brentuximab Vedotin) in combination with chemotherapy for adults with previously untreated stage III or IV Classical Hodgkin Lymphoma in March 2018 [L1737, L1739].	TNFRSF8	1	-3.29584	-0.0610348
Chloramphenicol	Used in treatment of cholera, as it destroys the vibrios and decreases the diarrhea. It is effective against tetracycline-resistant vibrios. It is also used in eye drops or ointment to treat bacterial conjunctivitis.	CD55	1	-3.3673	-0.0612493
Lorcaserin	For the treatment of obesity, as an adjunct to a reduced-calorie diet and increased physical activity.	HTR2C	1	-3.43399	-0.0614495
m-Chlorophenylpiperazine	-	HTR2C	1	-3.43399	-0.0614495
Pegaptanib	For the treatment of neovascular (wet) age-related macular degeneration.	NRP1	1	-3.55535	-0.0618139
L-aminocarnityl-succinyl-leucyl-argininal-diethylacetal	Investigated for use/treatment in muscular dystrophy.	CAPN3	1	-3.7612	-0.0624319
N-(3-Phenyl-2-Sulfanylpropanoyl)Phenylalanylalanine	-	MME	1	-3.7612	-0.0624319
[2(R,S)-2-Sulfanylheptanoyl]-Phe-Ala	-	MME	1	-3.7612	-0.0624319
Daglutril	Investigated for use/treatment in congestive heart failure and hypertension.	MME	1	-3.7612	-0.0624319
2-[(1S)-1-BENZYL-2-SULFANYLETHYL]-1H-IMIDAZO[4,5-C]PYRIDIN-5-IUM	-	MME	1	-3.7612	-0.0624319
Thiorphan	-	MME	1	-3.7612	-0.0624319
Sacubitril	Used in combination with valsartan to reduce the risk of cardiovascular events in patients with chronic heart failure (NYHA Class II-IV) and reduced ejection fraction. It is usually administered in conjunction with other heart failure therapies, in place of an ACE inhibitor or other ARB.	MME	1	-3.7612	-0.0624319
Candoxatrilat	-	MME	1	-3.7612	-0.0624319
Technetium Tc-99m tilmanocept	Indicated with or without scintigraphic imaging for lymphatic mapping using a handheld gamma counter to locate lymph nodes draining a primary tumor site in patients with solid tumors for which this procedure is a component of intraoperative management [FDA Label].	MRC1	1	-3.80666	-0.0625684
MMI-175	-	BACE1	1	-3.89182	-0.062824
CTS-21166	Investigated for use/treatment in alzheimer's disease.	BACE1	1	-3.89182	-0.062824
N-[amino(imino)methyl]-2-(2,5-diphenyl-1H-pyrrol-1-yl)acetamide	-	BACE1	1	-3.89182	-0.062824
N-[(5R,14R)-5-AMINO-5,14-DIMETHYL-4-OXO-3-OXA-18-AZATRICYCLO[15.3.1.1~7,11~]DOCOSA-1(21),7(22),8,10,17,19-HEXAEN-19-YL]-N-METHYLMETHANESULFONAMIDE	NA	BACE1	1	-3.89182	-0.062824
N-[amino(imino)methyl]-2-[2-(2-chlorophenyl)-4-(4-propoxyphenyl)-3-thienyl]acetamide	-	BACE1	1	-3.89182	-0.062824
4-(4-FLUOROBENZYL)PIPERIDINE	-	BACE1	1	-3.89182	-0.062824
N-{2-methyl-5-[(6-phenylpyrimidin-4-yl)amino]phenyl}methanesulfonamide	-	BACE1	1	-3.89182	-0.062824
6-[2-(1H-INDOL-6-YL)ETHYL]PYRIDIN-2-AMINE	-	BACE1	1	-3.89182	-0.062824
6-[2-(3'-METHOXYBIPHENYL-3-YL)ETHYL]PYRIDIN-2-AMINE	-	BACE1	1	-3.89182	-0.062824
N~3~-BENZYLPYRIDINE-2,3-DIAMINE	NA	BACE1	1	-3.89182	-0.062824
N~3~-(3-PYRIDIN-3-YLBENZYL)PYRIDINE-2,3-DIAMINE	NA	BACE1	1	-3.89182	-0.062824
N~3~-[3-(5-METHOXYPYRIDIN-3-YL)BENZYL]PYRIDINE-2,3-DIAMINE	NA	BACE1	1	-3.89182	-0.062824
4-(2-aminoethyl)-2-cyclohexylphenol	-	BACE1	1	-3.89182	-0.062824
4-(2-aminoethyl)-2-ethylphenol	-	BACE1	1	-3.89182	-0.062824
4-[(1S)-1-(3-fluoro-4-methoxyphenyl)-2-(2-methoxy-5-nitrophenyl)ethyl]-1H-imidazol-2-amine	-	BACE1	1	-3.89182	-0.062824
(6R)-2-amino-6-[2-(3'-methoxybiphenyl-3-yl)ethyl]-3,6-dimethyl-5,6-dihydropyrimidin-4(3H)-one	-	BACE1	1	-3.89182	-0.062824
2-amino-6-[2-(1H-indol-6-yl)ethyl]pyrimidin-4(3H)-one	-	BACE1	1	-3.89182	-0.062824
(2S)-1-(2,5-dimethylphenoxy)-3-morpholin-4-ylpropan-2-ol	-	BACE1	1	-3.89182	-0.062824
N-(1-benzylpiperidin-4-yl)-4-sulfanylbutanamide	-	BACE1	1	-3.89182	-0.062824
N-[1-(2,6-dimethoxybenzyl)piperidin-4-yl]-4-sulfanylbutanamide	-	BACE1	1	-3.89182	-0.062824
(2S)-4-(4-fluorobenzyl)-N-(2-sulfanylethyl)piperazine-2-carboxamide	-	BACE1	1	-3.89182	-0.062824
(2S)-4-(4-fluorobenzyl)-N-(3-sulfanylpropyl)piperazine-2-carboxamide	-	BACE1	1	-3.89182	-0.062824
N-[1-(5-bromo-2,3-dimethoxybenzyl)piperidin-4-yl]-4-sulfanylbutanamide	-	BACE1	1	-3.89182	-0.062824
(6S)-2-amino-6-(3'-methoxybiphenyl-3-yl)-3,6-dimethyl-5,6-dihydropyrimidin-4(3H)-one	-	BACE1	1	-3.89182	-0.062824
N~3~-[3-(1H-INDOL-6-YL)BENZYL]PYRIDINE-2,3-DIAMINE	NA	BACE1	1	-3.89182	-0.062824
N~3~-[5-(1H-INDOL-6-YL)-2-(PYRIDIN-2-YLMETHOXY)BENZYL]PYRIDINE-2,3-DIAMINE	NA	BACE1	1	-3.89182	-0.062824
3-(2-AMINO-6-BENZOYLQUINAZOLIN-3(4H)-YL)-N-CYCLOHEXYL-N-METHYLPROPANAMIDE	-	BACE1	1	-3.89182	-0.062824
Verubecestat	-	BACE1	1	-3.89182	-0.062824
Propanoic acid	Propanoic acid and various direct sodium or calcium salt formulations of the acid are currently most commonly approved and indicated by organizations like the FDA and EMA for use as an antibacterial food additive preservative in animal feed and food for human consumption [L2715, L2716].	GPHN	1	-3.97029	-0.0630596
Calcifediol	Used to treat vitamin D deficiency or insufficiency, refractory rickets (vitamin D resistant rickets), familial hypophosphatemia and hypoparathyroidism, and in the management of hypocalcemia and renal osteodystrophy in patients with chronic renal failure undergoing dialysis. Also used in conjunction with calcium in the management and prevention of primary or corticosteroid-induced osteoporosis.	VDR	1	-4.11087	-0.0634817
Ergocalciferol	For use in the management of hypocalcemia and its clinical manifestations in patients with hypoparathyroidism, as well as for the treatment of familial hypophosphatemia (vitamin D resistant rickets). This drug has also been used in the treatment of nutritional rickets or osteomalacia, vitamin D dependent rickets, rickets or osteomalacia secondary to long-term high dose anticonvulsant therapy, ear…	VDR	1	-4.11087	-0.0634817
Cholecalciferol	For the treatment of vitamin D deficiency or insufficiency, refractory rickets (vitamin D resistant rickets), familial hypophosphatemia and hypoparathyroidism, and in the management of hypocalcemia and renal osteodystrophy in patients with chronic renal failure undergoing dialysis. Also used in conjunction with calcium in the management and prevention of primary or corticosteroid-induced osteopor…	VDR	1	-4.11087	-0.0634817
Paricalcitol	For treatment of secondary hyperparathyroidism associated with chronic kidney disease (CKD) Stage 3 and 4	VDR	1	-4.11087	-0.0634817
Dihydrotachysterol	Used for the prevention and treatment of rickets or osteomalacia, and to manage hypocalcemia associated with hypoparathyroidism or pseudohypoparathyroidism. Also used for the treatment of vitamin D dependent rickets, rickets or osteomalacia secondary to long-term high dose anticonvulsant therapy, early renal osteodystrophy, osteoporosis (in conjunction with calcium), and hypophosphatemia associat…	VDR	1	-4.11087	-0.0634817
Calcipotriol	For the treatment of moderate plaque psoriasis in adults.	VDR	1	-4.11087	-0.0634817
1-alpha, 25-dihydroxyl-20-epi-22-oxa-24, 26 ,27-trihomovitamin D3	-	VDR	1	-4.11087	-0.0634817
Seocalcitol	-	VDR	1	-4.11087	-0.0634817
Inecalcitol	Investigated for use/treatment in prostate cancer, psoriasis and hyperparathyroidism.	VDR	1	-4.11087	-0.0634817
Eldecalcitol	Investigated for use/treatment in osteoporosis.	VDR	1	-4.11087	-0.0634817
Elocalcitol	Investigated for use/treatment in benign prostatic hyperplasia, urinary incontinence, prostate disorders, and infertility.	VDR	1	-4.11087	-0.0634817
Doxercalciferol	Doxercalciferol is indicated for the treatment of secondary hyperparathyroidism in patients with chronic kidney disease on dialysis, as well as for the treatment of secondary hyperparathyroidism in patients with Stage 3 or Stage 4 chronic kidney disease.	VDR	1	-4.11087	-0.0634817
Dithioerythritol	-	TK1	1	-4.44265	-0.0644777
Isotretinoin	For the treatment of severe recalcitrant nodular acne	RARA	1	-4.51086	-0.0646825
Berberine	-	BIRC5	1	-4.74493	-0.0653852
LY2181308	Investigated for use/treatment in cancer/tumors (unspecified) and solid tumors.	BIRC5	1	-4.74493	-0.0653852
(5-Oxo-5,6-Dihydro-Indolo[1,2-a]Quinazolin-7-Yl)-Acetic Acid	-	CSNK2A1	1	-4.79579	-0.0655379
1,8-Di-Hydroxy-4-Nitro-Xanthen-9-One	-	CSNK2A1	1	-4.79579	-0.0655379
1,8-Di-Hydroxy-4-Nitro-Anthraquinone	-	CSNK2A1	1	-4.79579	-0.0655379
5,8-Di-Amino-1,4-Dihydroxy-Anthraquinone	-	CSNK2A1	1	-4.79579	-0.0655379
Tetrabromo-2-Benzotriazole	-	CSNK2A1	1	-4.79579	-0.0655379
DIMETHYL-(4,5,6,7-TETRABROMO-1H-BENZOIMIDAZOL-2-YL)-AMINE	-	CSNK2A1	1	-4.79579	-0.0655379
S-METHYL-4,5,6,7-TETRABROMO-BENZIMIDAZOLE	-	CSNK2A1	1	-4.79579	-0.0655379
N1,N2-ETHYLENE-2-METHYLAMINO-4,5,6,7-TETRABROMO-BENZIMIDAZOLE	-	CSNK2A1	1	-4.79579	-0.0655379
3,8-DIBROMO-7-HYDROXY-4-METHYL-2H-CHROMEN-2-ONE	-	CSNK2A1	1	-4.79579	-0.0655379
19-(cyclopropylamino)-4,6,7,15-tetrahydro-5H-16,1-(azenometheno)-10,14-(metheno)pyrazolo[4,3-o][1,3,9]triazacyclohexadecin-8(9H)-one	-	CSNK2A1	1	-4.79579	-0.0655379
N,N'-DIPHENYLPYRAZOLO[1,5-A][1,3,5]TRIAZINE-2,4-DIAMINE	-	CSNK2A1	1	-4.79579	-0.0655379
4-(2-(1H-IMIDAZOL-4-YL)ETHYLAMINO)-2-(PHENYLAMINO)PYRAZOLO[1,5-A][1,3,5]TRIAZINE-8-CARBONITRILE	-	CSNK2A1	1	-4.79579	-0.0655379
2-(CYCLOHEXYLMETHYLAMINO)-4-(PHENYLAMINO)PYRAZOLO[1,5-A][1,3,5]TRIAZINE-8-CARBONITRILE	-	CSNK2A1	1	-4.79579	-0.0655379
2-(4-CHLOROBENZYLAMINO)-4-(PHENYLAMINO)PYRAZOLO[1,5-A][1,3,5]TRIAZINE-8-CARBONITRILE	-	CSNK2A1	1	-4.79579	-0.0655379
2-(4-ETHYLPIPERAZIN-1-YL)-4-(PHENYLAMINO)PYRAZOLO[1,5-A][1,3,5]TRIAZINE-8-CARBONITRILE	-	CSNK2A1	1	-4.79579	-0.0655379
N-(3-(8-CYANO-4-(PHENYLAMINO)PYRAZOLO[1,5-A][1,3,5]TRIAZIN-2-YLAMINO)PHENYL)ACETAMIDE	-	CSNK2A1	1	-4.79579	-0.0655379
5,6-dichloro-1-beta-D-ribofuranosyl-1H-benzimidazole	-	CSNK2A1	1	-4.79579	-0.0655379
1,2,5,8-tetrahydroxyanthracene-9,10-dione	-	CSNK2A1	1	-4.79579	-0.0655379
Alisertib	For the treatment of various forms of cancer.	AURKA	1	-5.0689	-0.0663579
Cenisertib	Investigated for use/treatment in solid tumors, leukemia (myeloid), myelodysplastic syndrome, and cancer/tumors (unspecified).	AURKA	1	-5.0689	-0.0663579
8-ethyl-3,10,10-trimethyl-4,5,6,8,10,12-hexahydropyrazolo[4',3':6,7]cyclohepta[1,2-b]pyrrolo[2,3-f]indol-9(1H)-one	-	AURKA	1	-5.0689	-0.0663579
1-{5-[2-(thieno[3,2-d]pyrimidin-4-ylamino)ethyl]-1,3-thiazol-2-yl}-3-[3-(trifluoromethyl)phenyl]urea	-	AURKA	1	-5.0689	-0.0663579
1-(5-{2-[(1-methyl-1H-pyrazolo[4,3-d]pyrimidin-7-yl)amino]ethyl}-1,3-thiazol-2-yl)-3-[3-(trifluoromethyl)phenyl]urea	-	AURKA	1	-5.0689	-0.0663579
N-{3-[(4-{[3-(TRIFLUOROMETHYL)PHENYL]AMINO}PYRIMIDIN-2-YL)AMINO]PHENYL}CYCLOPROPANECARBOXAMIDE	-	AURKA	1	-5.0689	-0.0663579
N-butyl-3-{[6-(9H-purin-6-ylamino)hexanoyl]amino}benzamide	-	AURKA	1	-5.0689	-0.0663579
2-(1H-pyrazol-3-yl)-1H-benzimidazole	-	AURKA	1	-5.0689	-0.0663579
MLN8054	-	AURKA	1	-5.0689	-0.0663579
4-[5-[2-(1-Phenyl-Ethylamino)-Pyrimidin-4-Yl]-1-Methyl-4-(3-Trifluoromethylphenyl)-1h-Imidazol-2-Yl]-Piperidine	-	MAPK14	1	-5.1299	-0.066541
N-[(3z)-5-Tert-Butyl-2-Phenyl-1,2-Dihydro-3h-Pyrazol-3-Ylidene]-N'-(4-Chlorophenyl)Urea	-	MAPK14	1	-5.1299	-0.066541
1-(2,6-Dichlorophenyl)-5-(2,4-Difluorophenyl)-7-Piperidin-4-Yl-3,4-Dihydroquinolin-2(1h)-One	-	MAPK14	1	-5.1299	-0.066541
Inhibitor of P38 Kinase	-	MAPK14	1	-5.1299	-0.066541
6((S)-3-Benzylpiperazin-1-Yl)-3-(Naphthalen-2-Yl)-4-(Pyridin-4-Yl)Pyrazine	-	MAPK14	1	-5.1299	-0.066541
3-(4-Fluorophenyl)-1-Hydroxy-2-(Pyridin-4-Yl)-1h-Pyrrolo[3,2-B]Pyridine	-	MAPK14	1	-5.1299	-0.066541
1-(5-Tert-Butyl-2-Methyl-2h-Pyrazol-3-Yl)-3-(4-Chloro-Phenyl)-Urea	-	MAPK14	1	-5.1299	-0.066541
1-(2,6-Dichlorophenyl)-5-(2,4-Difluorophenyl)-7-Piperazin-1-Yl-3,4-Dihydroquinazolin-2(1h)-One	-	MAPK14	1	-5.1299	-0.066541
4-[3-Methylsulfanylanilino]-6,7-Dimethoxyquinazoline	-	MAPK14	1	-5.1299	-0.066541
1-(5-Tert-Butyl-2-P-Tolyl-2h-Pyrazol-3-Yl)-3-[4-(2-Morpholin-4-Yl-Ethoxy)-Naphthalen-1-Yl]-Urea	-	MAPK14	1	-5.1299	-0.066541
2-Chlorophenol	-	MAPK14	1	-5.1299	-0.066541
4-(Fluorophenyl)-1-Cyclopropylmethyl-5-(2-Amino-4-Pyrimidinyl)Imidazole	-	MAPK14	1	-5.1299	-0.066541
4-(2-HYDROXYBENZYLAMINO)-N-(3-(4-FLUOROPHENOXY)PHENYL)PIPERIDINE-1-SULFONAMIDE	-	MAPK14	1	-5.1299	-0.066541
Triazolopyridine	-	MAPK14	1	-5.1299	-0.066541
R-1487	Investigated for use/treatment in rheumatoid arthritis.	MAPK14	1	-5.1299	-0.066541
N-ethyl-4-{[5-(methoxycarbamoyl)-2-methylphenyl]amino}-5-methylpyrrolo[2,1-f][1,2,4]triazine-6-carboxamide	-	MAPK14	1	-5.1299	-0.066541
N-[2-methyl-5-(methylcarbamoyl)phenyl]-2-{[(1R)-1-methylpropyl]amino}-1,3-thiazole-5-carboxamide	-	MAPK14	1	-5.1299	-0.066541
Neflamapimod	-	MAPK14	1	-5.1299	-0.066541
N-cyclopropyl-4-methyl-3-[1-(2-methylphenyl)phthalazin-6-yl]benzamide	-	MAPK14	1	-5.1299	-0.066541
4-PHENOXY-N-(PYRIDIN-2-YLMETHYL)BENZAMIDE	-	MAPK14	1	-5.1299	-0.066541
4-[5-(3-IODO-PHENYL)-2-(4-METHANESULFINYL-PHENYL)-1H-IMIDAZOL-4-YL]-PYRIDINE	-	MAPK14	1	-5.1299	-0.066541
N-cyclopropyl-2',6-dimethyl-4'-(5-methyl-1,3,4-oxadiazol-2-yl)biphenyl-3-carboxamide	-	MAPK14	1	-5.1299	-0.066541
4-[3-(4-FLUOROPHENYL)-1H-PYRAZOL-4-YL]PYRIDINE	-	MAPK14	1	-5.1299	-0.066541
4-{4-[(5-hydroxy-2-methylphenyl)amino]quinolin-7-yl}-1,3-thiazole-2-carbaldehyde	-	MAPK14	1	-5.1299	-0.066541
N-(3-cyanophenyl)-2'-methyl-5'-(5-methyl-1,3,4-oxadiazol-2-yl)-4-biphenylcarboxamide	-	MAPK14	1	-5.1299	-0.066541
N-(cyclopropylmethyl)-2'-methyl-5'-(5-methyl-1,3,4-oxadiazol-2-yl)biphenyl-4-carboxamide	-	MAPK14	1	-5.1299	-0.066541
N~3~-cyclopropyl-N~4~'-(cyclopropylmethyl)-6-methylbiphenyl-3,4'-dicarboxamide	NA	MAPK14	1	-5.1299	-0.066541
PH-797804	-	MAPK14	1	-5.1299	-0.066541
2-fluoro-4-[4-(4-fluorophenyl)-1H-pyrazol-3-yl]pyridine	-	MAPK14	1	-5.1299	-0.066541
2-{4-[5-(4-chlorophenyl)-4-pyrimidin-4-yl-1H-pyrazol-3-yl]piperidin-1-yl}-2-oxoethanol	-	MAPK14	1	-5.1299	-0.066541
N-(3-TERT-BUTYL-1H-PYRAZOL-5-YL)-N'-{4-CHLORO-3-[(PYRIDIN-3-YLOXY)METHYL]PHENYL}UREA	-	MAPK14	1	-5.1299	-0.066541
N-[4-CHLORO-3-(PYRIDIN-3-YLOXYMETHYL)-PHENYL]-3-FLUORO-	-	MAPK14	1	-5.1299	-0.066541
3-FLUORO-5-MORPHOLIN-4-YL-N-[3-(2-PYRIDIN-4-YLETHYL)-1H-INDOL-5-YL]BENZAMIDE	-	MAPK14	1	-5.1299	-0.066541
3-fluoro-N-1H-indol-5-yl-5-morpholin-4-ylbenzamide	-	MAPK14	1	-5.1299	-0.066541
3-(1-NAPHTHYLMETHOXY)PYRIDIN-2-AMINE	-	MAPK14	1	-5.1299	-0.066541
3-(2-CHLOROPHENYL)-1-(2-{[(1S)-2-HYDROXY-1,2-DIMETHYLPROPYL]AMINO}PYRIMIDIN-4-YL)-1-(4-METHOXYPHENYL)UREA	-	MAPK14	1	-5.1299	-0.066541
8-(2-CHLOROPHENYLAMINO)-2-(2,6-DIFLUOROPHENYLAMINO)-9-ETHYL-9H-PURINE-1,7-DIIUM	-	MAPK14	1	-5.1299	-0.066541
2-(2,6-DIFLUOROPHENOXY)-N-(2-FLUOROPHENYL)-9-ISOPROPYL-9H-PURIN-8-AMINE	-	MAPK14	1	-5.1299	-0.066541
N,4-dimethyl-3-[(1-phenyl-1H-pyrazolo[3,4-d]pyrimidin-4-yl)amino]benzamide	-	MAPK14	1	-5.1299	-0.066541
N-cyclopropyl-3-{[1-(2,4-difluorophenyl)-7-methyl-6-oxo-6,7-dihydro-1H-pyrazolo[3,4-b]pyridin-4-yl]amino}-4-methylbenzamide	-	MAPK14	1	-5.1299	-0.066541
N-cyclopropyl-4-methyl-3-{2-[(2-morpholin-4-ylethyl)amino]quinazolin-6-yl}benzamide	-	MAPK14	1	-5.1299	-0.066541
6-[4-(2-fluorophenyl)-1,3-oxazol-5-yl]-N-(1-methylethyl)-1,3-benzothiazol-2-amine	-	MAPK14	1	-5.1299	-0.066541
2-(ETHOXYMETHYL)-4-(4-FLUOROPHENYL)-3-[2-(2-HYDROXYPHENOXY)PYRIMIDIN-4-YL]ISOXAZOL-5(2H)-ONE	-	MAPK14	1	-5.1299	-0.066541
[5-AMINO-1-(4-FLUOROPHENYL)-1H-PYRAZOL-4-YL][3-(PIPERIDIN-4-YLOXY)PHENYL]METHANONE	-	MAPK14	1	-5.1299	-0.066541
[5-AMINO-1-(4-FLUOROPHENYL)-1H-PYRAZOL-4-YL](3-{[(2R)-2,3-DIHYDROXYPROPYL]OXY}PHENYL)METHANONE	-	MAPK14	1	-5.1299	-0.066541
4-(4-FLUOROPHENYL)-1-CYCLOROPROPYLMETHYL-5-(4-PYRIDYL)-IMIDAZOLE	-	MAPK14	1	-5.1299	-0.066541
3-FLUORO-5-MORPHOLIN-4-YL-N-[1-(2-PYRIDIN-4-YLETHYL)-1H-INDOL-6-YL]BENZAMIDE	-	MAPK14	1	-5.1299	-0.066541
